# Supplementary material for: Laser-Ablative Synthesis of Isotope-Enriched Samarium Oxide Nanoparticles for Nuclear Nanomedicine
Source: MDPI journal article supplement (doi:10.3390/nano10010069), 2019-12-28
Supplement: s1 [file s1]

# Supplementary Materials: Laser-Ablative Synthesis of Isotope-Enriched Samarium Oxide Nanoparticles for Nuclear Nanomedicine

Elena Popova-Kuznetsova <sup>1</sup>, Gleb Tikhonowski <sup>1</sup>, Anton A. Popov <sup>1,\*</sup>, Vladimir Duflo <sup>2</sup>, Sergey Deyev <sup>1,3</sup>, Sergey Klimentov <sup>1</sup>, Irina Zavestovskaya <sup>1,4</sup>, Paras N. Prasad <sup>1,5,\*</sup> and Andrei V. Kabashin <sup>1,6,\*</sup>

<sup>1</sup> Bionanophotonic Lab., Institute of Engineering Physics for Biomedicine (PhysBio), National Nuclear Research University MEPhI, Moscow 115409, Russia; EAPopovaKuznetsova@mephi.ru (E.P.-K.); gtikhonowski@gmail.com (G.T.); SMKlimentov@mephi.ru (S.K.); INZavestovskaya@mephi.ru (I.Z.)

<sup>2</sup> Karpov Institute of Physical Chemistry, NIFKhI, Obninsk 249033, Kaluga region, Russia; duflo@mail.ru

<sup>3</sup> Shemyakin–Ovchinnikov Institute of Bioorganic Chemistry, Russian Academy of Sciences, Moscow 117997, Russia; deye@ibch.ru (S.D.)

<sup>4</sup> Lebedev Physical Institute of the Russian Academy Sciences, Moscow 119991, Russia

<sup>5</sup> Department of Chemistry and Institute for Lasers, Photonics, and Biophotonics, University at Buffalo, The State University of New York, Buffalo, NY 14260, USA; pnprasad@buffalo.edu (P.N.P.)

<sup>6</sup> LP3, Aix Marseille University, CNRS, Marseille 13288, France; kabashin@lp3.univ-mrs.fr (A.V.K.)

\* Correspondence: AAPopov@mephi.ru (A.A.P.); pnprasad@buffalo.edu (P.N.P.); kabashin@lp3.univ-mrs.fr (A.V.K.)

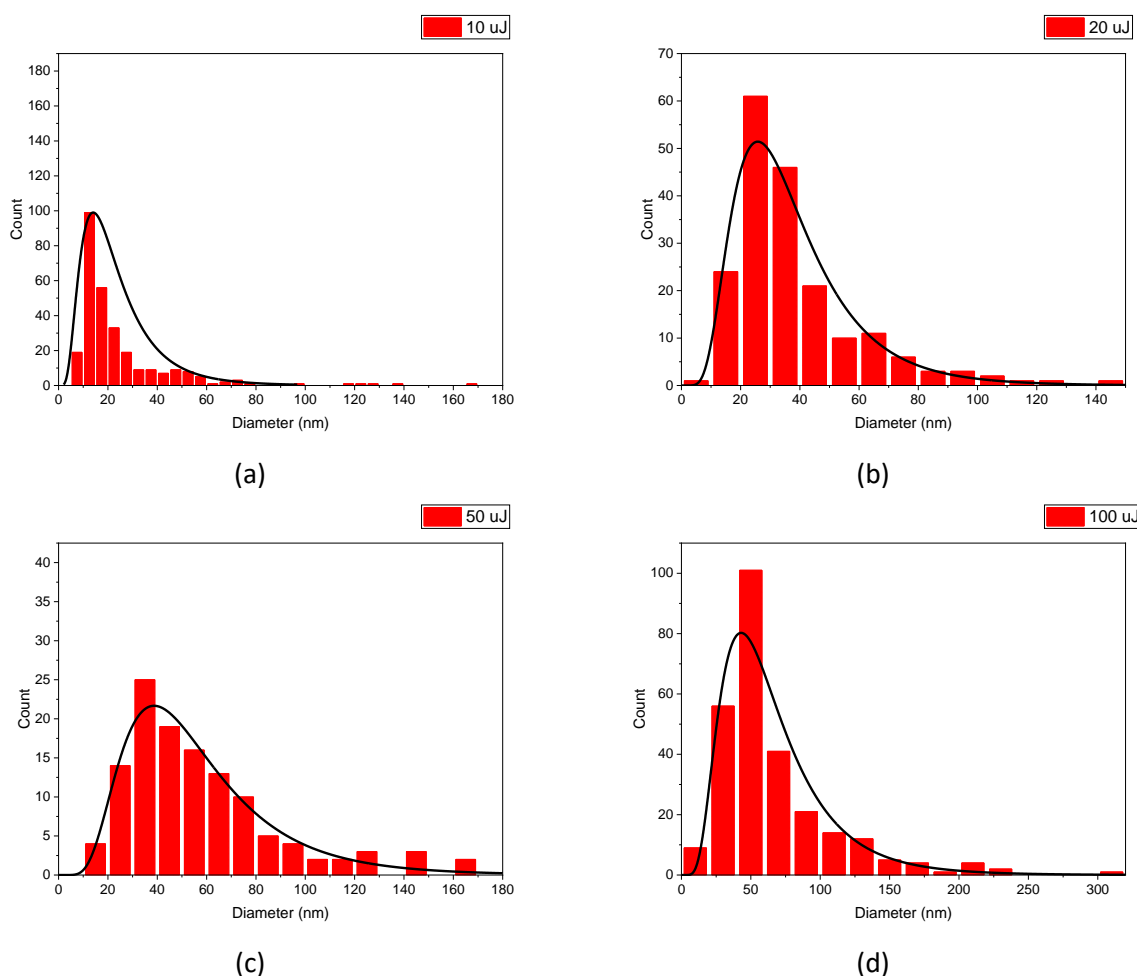

**Figure S1.** Size histograms of spherical fraction of Sm oxide NPs, obtained by laser ablation at (a) 10  $\mu$ J, (b) 20  $\mu$ J, (c) 50  $\mu$ J and (d) 100  $\mu$ J laser energies. The second mode of large NPs could be seen on size distribution at (a) 50 nm, (b) 65 nm, (c) 145 nm and (d) 210 nm.
